# Supplementary material for: The demographics of vaccine hesitancy in Shanghai, China
Source: PubMed Central journal article supplement (PMC6292563; doi:10.1371/journal.pone.0209117), 2018-12-13
Supplement: pone.0209117.s001.pdf [file pone.0209117.s001.pdf]

## S1 File

Factor loadings from the Vaccine Hesitancy Scale (as developed by the World Health Organization Strategic Advisory Group of Experts on Immunization (<https://doi.org/10.1016/j.vaccine.2015.04.037>)) are displayed below. This sample of caregivers from Shanghai is compared with a sample of Canadian parents, as reported by Shapiro et al. (<https://doi.org/10.1016/j.vaccine.2017.12.043>).

For the purposes of comparison, we followed Shapiro et al.'s lead in deleting item 10 from the analysis. The study population was divided into two, with one half (n=546) being analyzed with an Exploratory Factor Analysis (EFA) with varimax orthogonal rotation, and the other half (n=538) being analyzed with a Confirmatory Factor Analysis (Table 1).

**S1 Table. EFA loadings and CFA standardized loadings.**

|           | Exploratory Factor Analysis        |                    |                                    |                    | Confirmatory Factor Analysis       |                       |                                    |                    |
|-----------|------------------------------------|--------------------|------------------------------------|--------------------|------------------------------------|-----------------------|------------------------------------|--------------------|
|           | Shanghai Sample                    |                    | Canadian Sample                    |                    | Shanghai Sample                    |                       | Canadian Sample                    |                    |
|           | Factor 1:<br>Lack of<br>confidence | Factor<br>2: Risks | Factor 1:<br>Lack of<br>confidence | Factor<br>2: Risks | Factor 1:<br>Lack of<br>confidence | Factor<br>2:<br>Risks | Factor 1:<br>Lack of<br>confidence | Factor 2:<br>Risks |
| <b>L1</b> | 0.671                              | 0.152              | 0.864                              | 0.195              | 0.522                              |                       | 0.868                              |                    |
| <b>L2</b> | 0.681                              | 0.316              | 0.818                              | 0.224              | 0.839                              |                       | 0.851                              |                    |
| <b>L3</b> | 0.716                              | 0.359              | 0.764                              | 0.195              | 0.815                              |                       | 0.809                              |                    |
| <b>L4</b> | 0.422                              | 0.581              | 0.719                              | 0.358              | 0.785                              |                       | 0.78                               |                    |
| <b>L6</b> | 0.242                              | 0.607              | 0.624                              | 0.446              | 0.733                              |                       | 0.733                              |                    |
| <b>L7</b> | 0.399                              | 0.614              | 0.853                              | 0.197              | 0.826                              |                       | 0.861                              |                    |
| <b>L8</b> | 0.430                              | 0.575              | 0.61                               | 0.216              | 0.840                              |                       | 0.671                              |                    |
| <b>L5</b> | -0.141                             | -0.296             | 0.17                               | 0.685              |                                    | 1.097                 |                                    | 0.661              |
| <b>L9</b> | -0.029                             | -0.187             | 0.193                              | 0.655              |                                    | 0.267                 |                                    | 0.682              |

Note that a standardized factor loading above 1 may indicate multicollinearity between factors (<http://www.ssicentral.com/lisrel/techdocs/HowLargeCanaStandardizedCoefficientbe.pdf>).

In general, items L1-L4 and L6-L8 were highly, positively correlated, with items L5, L9, and L10 having negative or null associations with other items.

**S2 Table. Spearman's correlation coefficient between Vaccine Hesitancy Scale Items**

|           | <b>L1</b> | <b>L2</b> | <b>L3</b> | <b>L4</b> | <b>L6</b> | <b>L7</b> | <b>L8</b> | <b>L5</b> | <b>L9</b> | <b>L10</b> |
|-----------|-----------|-----------|-----------|-----------|-----------|-----------|-----------|-----------|-----------|------------|
| <b>L1</b> |           | 0.61**    | 0.59**    | 0.49**    | 0.38**    | 0.51**    | 0.52**    | -0.10     | -0.13**   | 0.11       |
| <b>L2</b> |           |           | 0.71**    | 0.60**    | 0.52**    | 0.59**    | 0.56**    | -0.19**   | -0.09     | 0.09       |
| <b>L3</b> |           |           |           | 0.62**    | 0.50**    | 0.59**    | 0.63**    | -0.21**   | -0.12**   | 0.11       |
| <b>L4</b> |           |           |           |           | 0.57**    | 0.57**    | 0.55**    | -0.26**   | -0.13**   | 0.03       |
| <b>L6</b> |           |           |           |           |           | 0.59**    | 0.58**    | -0.33**   | -0.14**   | 0.03       |
| <b>L7</b> |           |           |           |           |           |           | 0.72**    | -0.22**   | -0.11     | 0.12**     |
| <b>L8</b> |           |           |           |           |           |           |           | -0.22**   | -0.17**   | 0.08       |
| <b>L5</b> |           |           |           |           |           |           |           |           | 0.25**    | 0.17**     |
| <b>L9</b> |           |           |           |           |           |           |           |           |           | 0.21**     |

\*\* P<0.0001 \*P<0.05
